# Supplementary material
Source: PubMed Central journal article supplement (PMC4629244)

Supplementary Figure 1

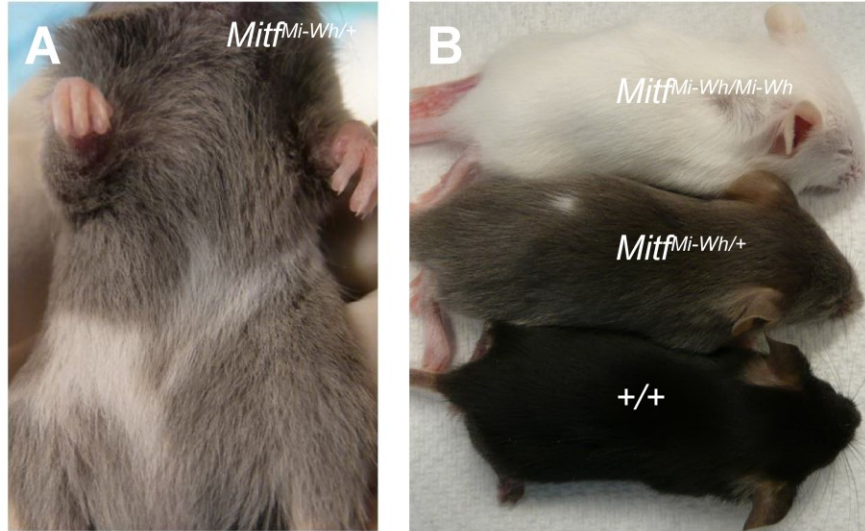

Supplementary Figure 2

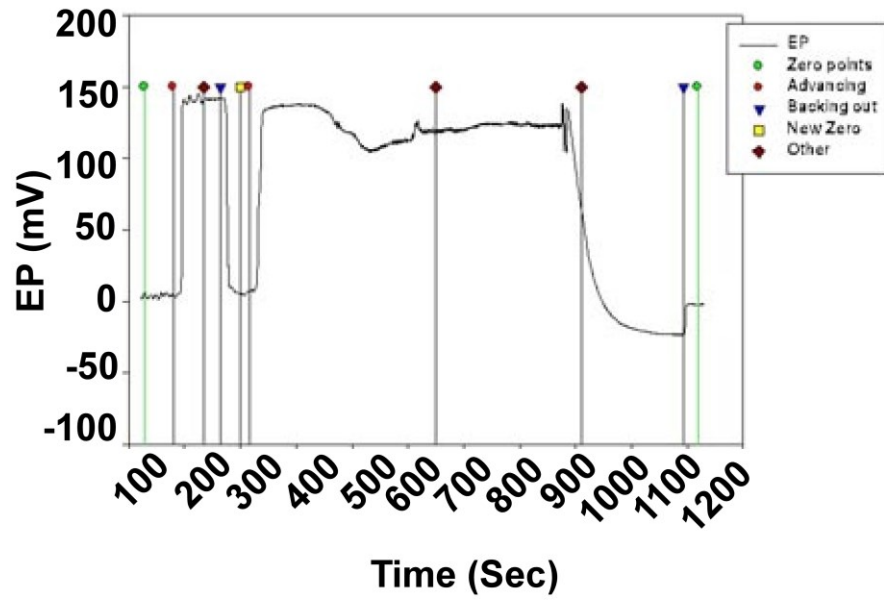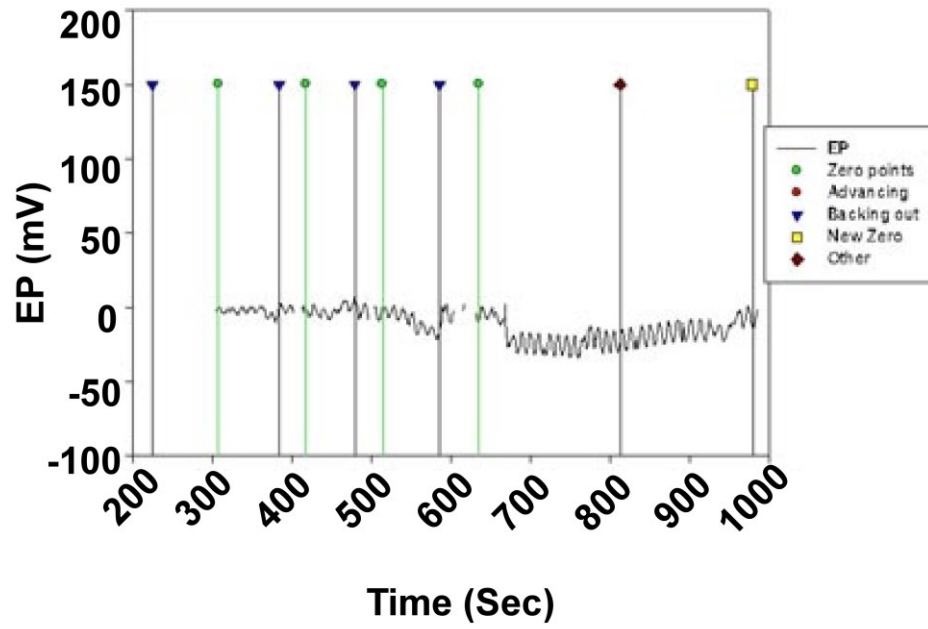

Supplementary Figure 3

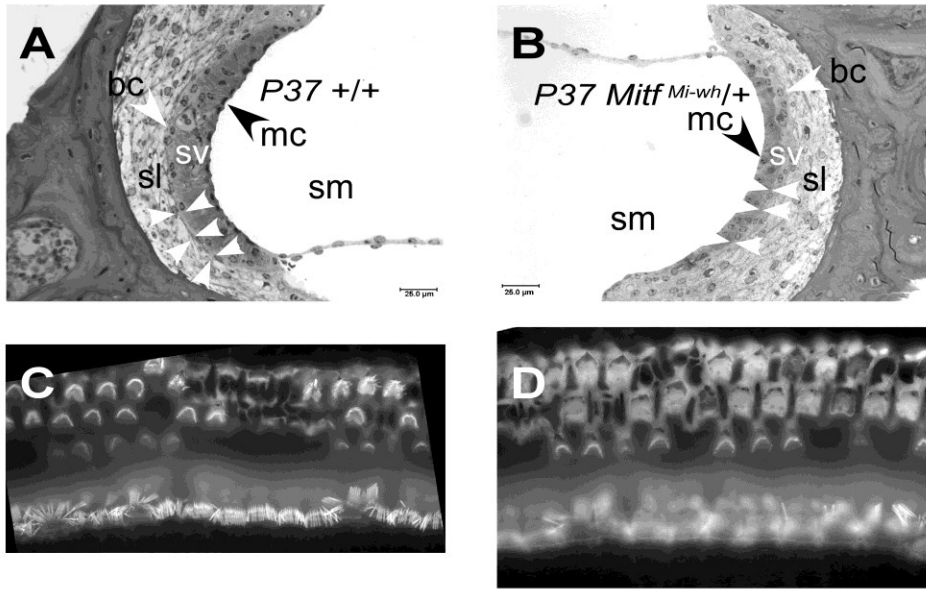

Supplementary Figure 4

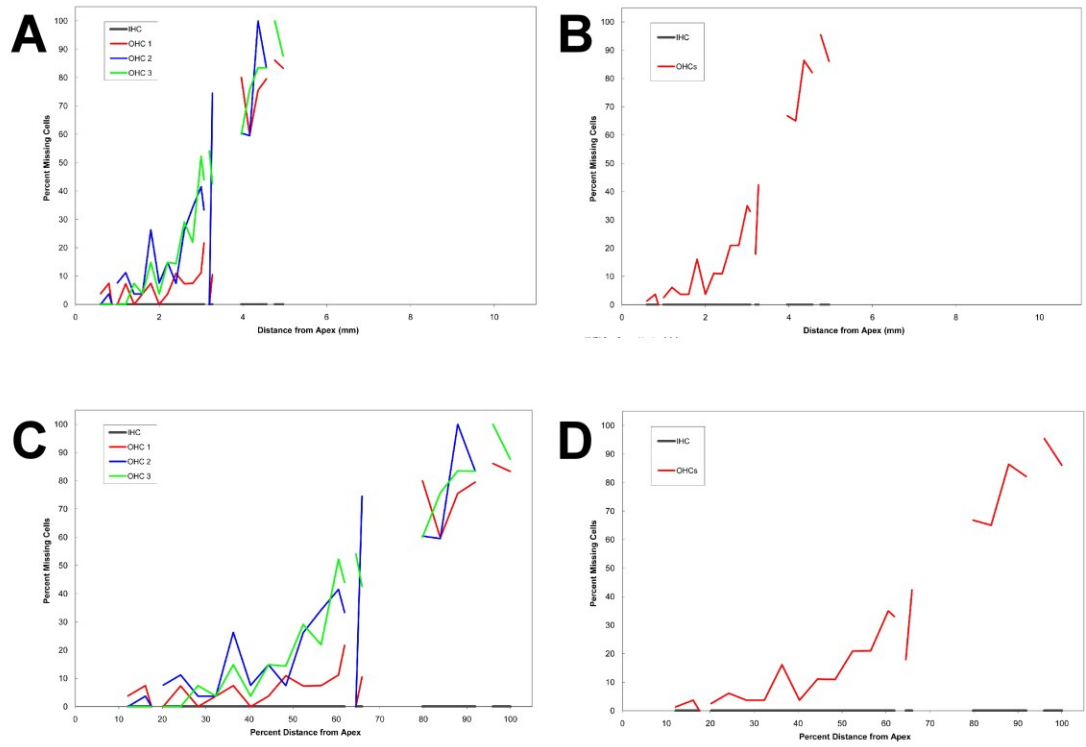

Supplementary Figure 5

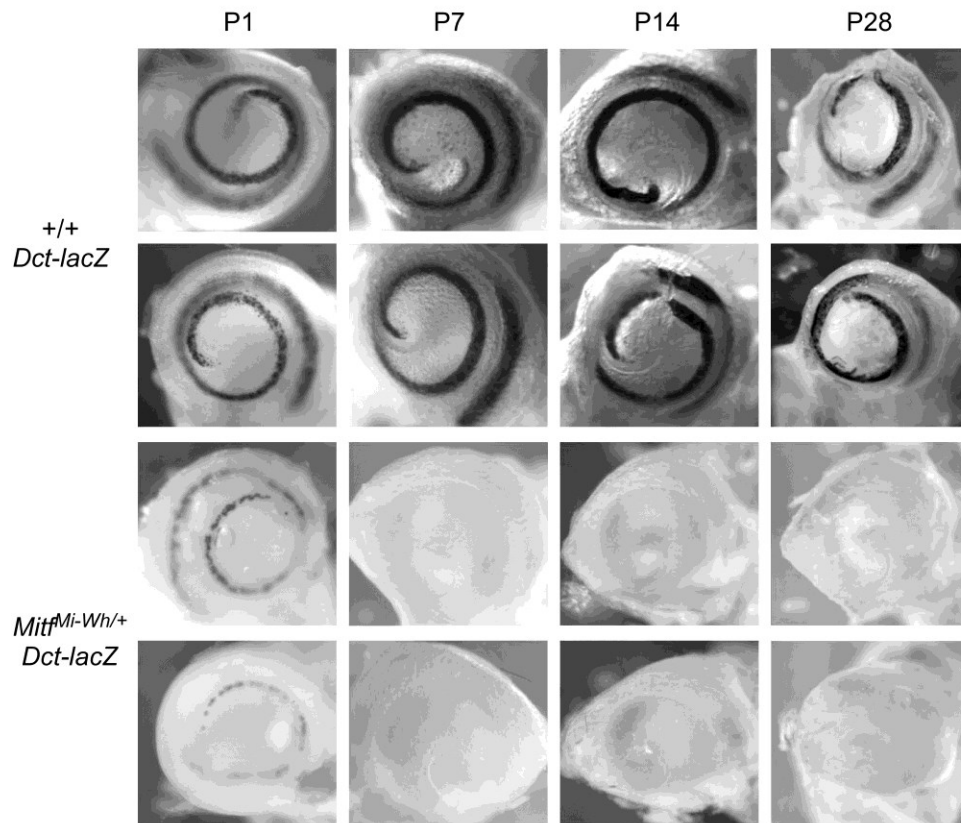

Supplementary Figure 6

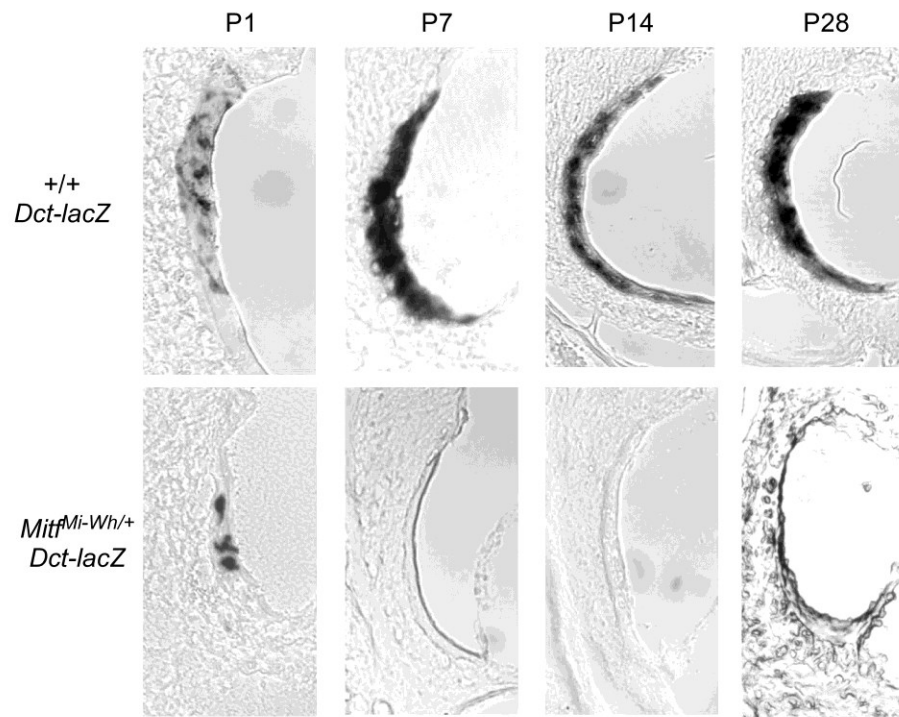

Supplement: NIHMS701006-supplement-supplement_1.pdf [file NIHMS701006-supplement-supplement_1.pdf]
